# Supplementary material for: Subglacial valleys preserved in the highlands of south and east Greenland record restricted ice extent during past warmer climates
Source: Copernicus journal article supplement (doi:10.5194/egusphere-2023-2502), 2023-11-07
Supplement: Supplementary file 1 [file egusphere-2023-2502-supplement.pdf]

# Supplementary Material for

## Subglacial valleys preserved in the highlands of south and east Greenland record restricted ice extent during past warmer climates

Guy J. G. Paxman<sup>1</sup>, Stewart S. R. Jamieson<sup>1</sup>, Aisling M. Dolan<sup>2</sup>, Michael J. Bentley<sup>1</sup>

5 <sup>1</sup>Department of Geography, Durham University, Durham, DH1 3LE, United Kingdom

<sup>2</sup>School of Earth and Environment, University of Leeds, Leeds, LS2 9JT, United Kingdom

*Correspondence to:* Guy J. G. Paxman ([guy.j.paxman@durham.ac.uk](mailto:guy.j.paxman@durham.ac.uk))

Contents of file:

- Figure S1
- 10 • Figure S2
- Figure S3

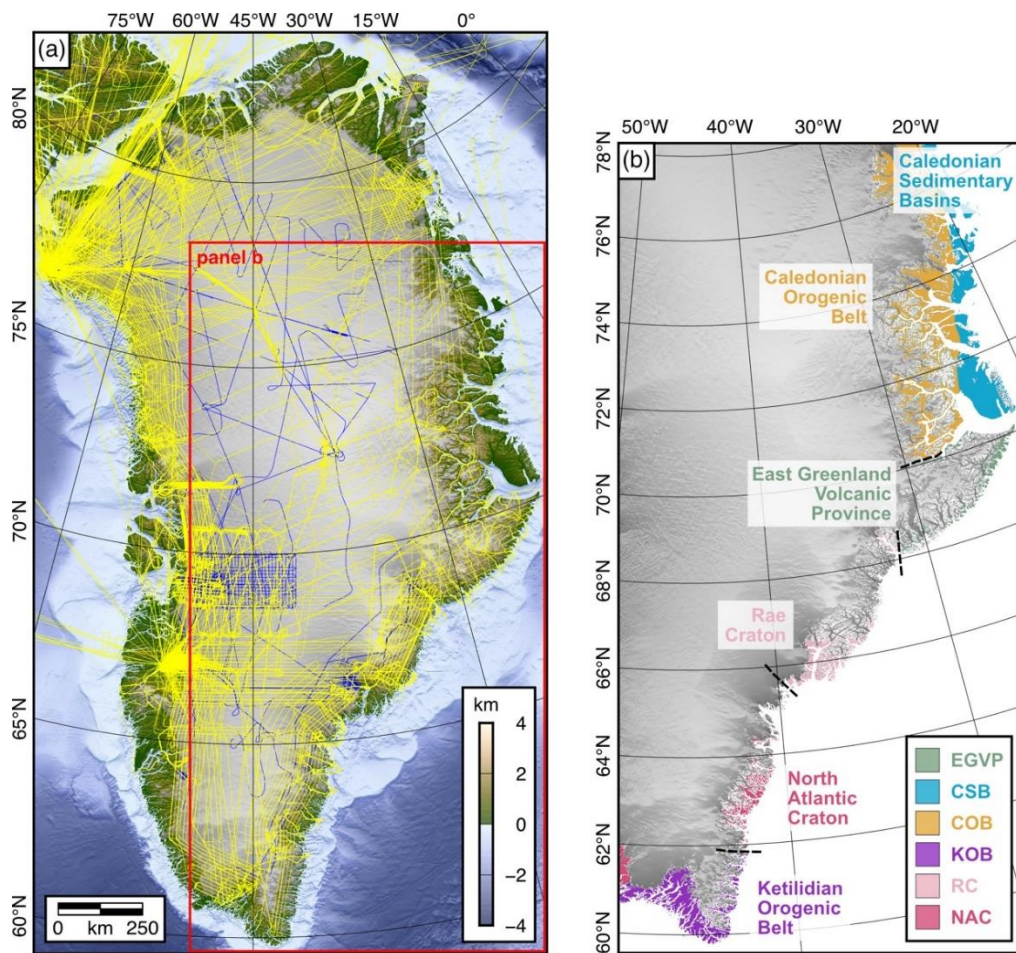

15 **Figure S1. Radio-echo sounding coverage and major geological provinces of Greenland.** (a) Radio-echo sounding survey lines from  
 Operation IceBridge (yellow; 2010–2019) and Center for Remote Sensing and Integrated Systems (blue; pre-2010) (Paden et al., 2019).  
 These lines were used to map subglacial valley cross-profiles (Paxman, 2023). The Greenland Ice Sheet surface is shaded in grey (Howat et  
 al., 2022); land surface topography and seafloor bathymetry are displayed according to the colour scale (relative to mean sea level)  
 (Morlighem et al., 2017). (b) Major geological provinces exposed along the eastern margin of Greenland (Henriksen et al., 2009). Provinces  
 20 are listed in stratigraphic order in the legend. Dashed black lines indicate the approximate locations of boundaries between provinces.

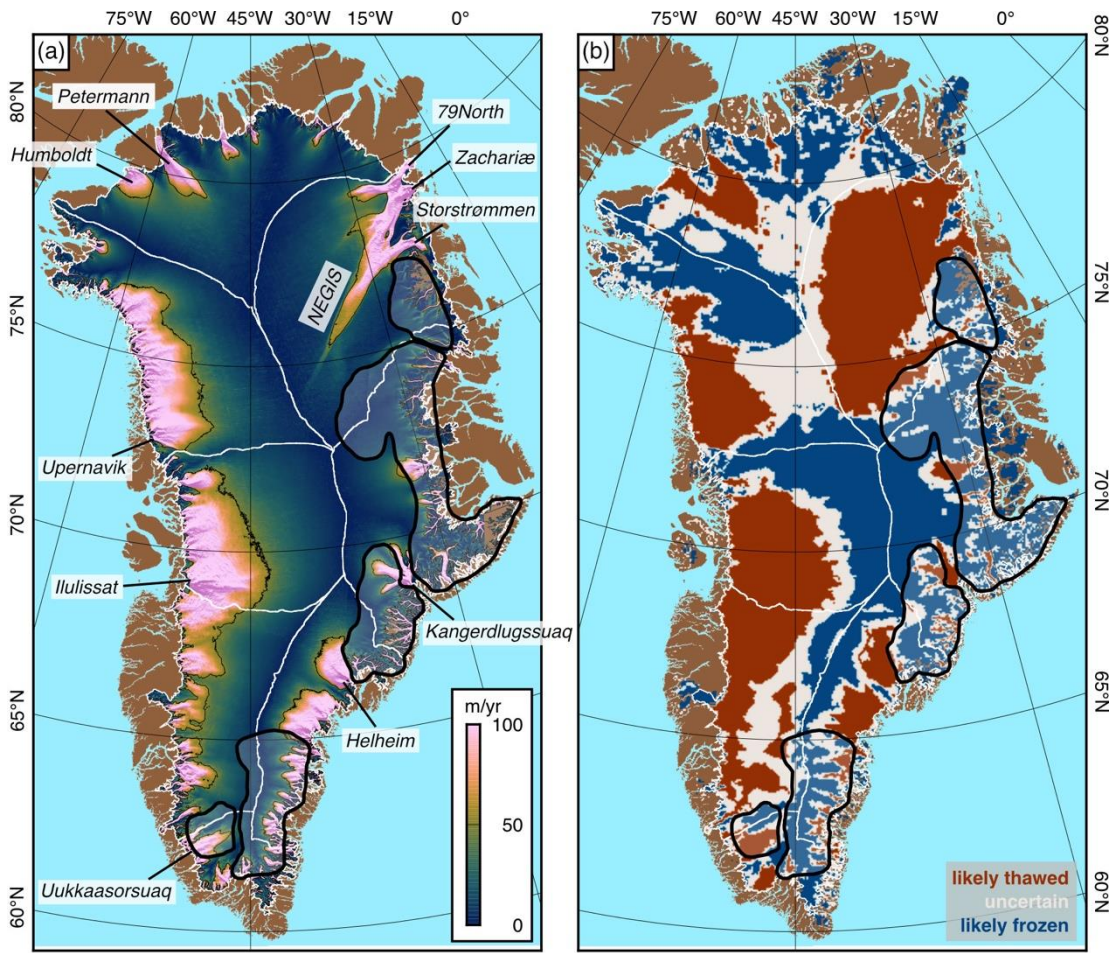

**Figure S2. Contemporary Greenland Ice Sheet dynamics.** (a) Ice surface velocity (Joughin et al., 2018). The 50 m/yr contour, an approximate threshold of the onset of fast flow, is marked by the thin black outline. Selected outlet glaciers are labelled. (b) Synthesis of the likely basal thermal state of the ice sheet (MacGregor et al., 2022). In both panels, thick black outlines denote the highland palaeo-glacial valley limits mapped in this study. White lines delineate major ice-sheet drainage catchments (Zwally et al., 2012).

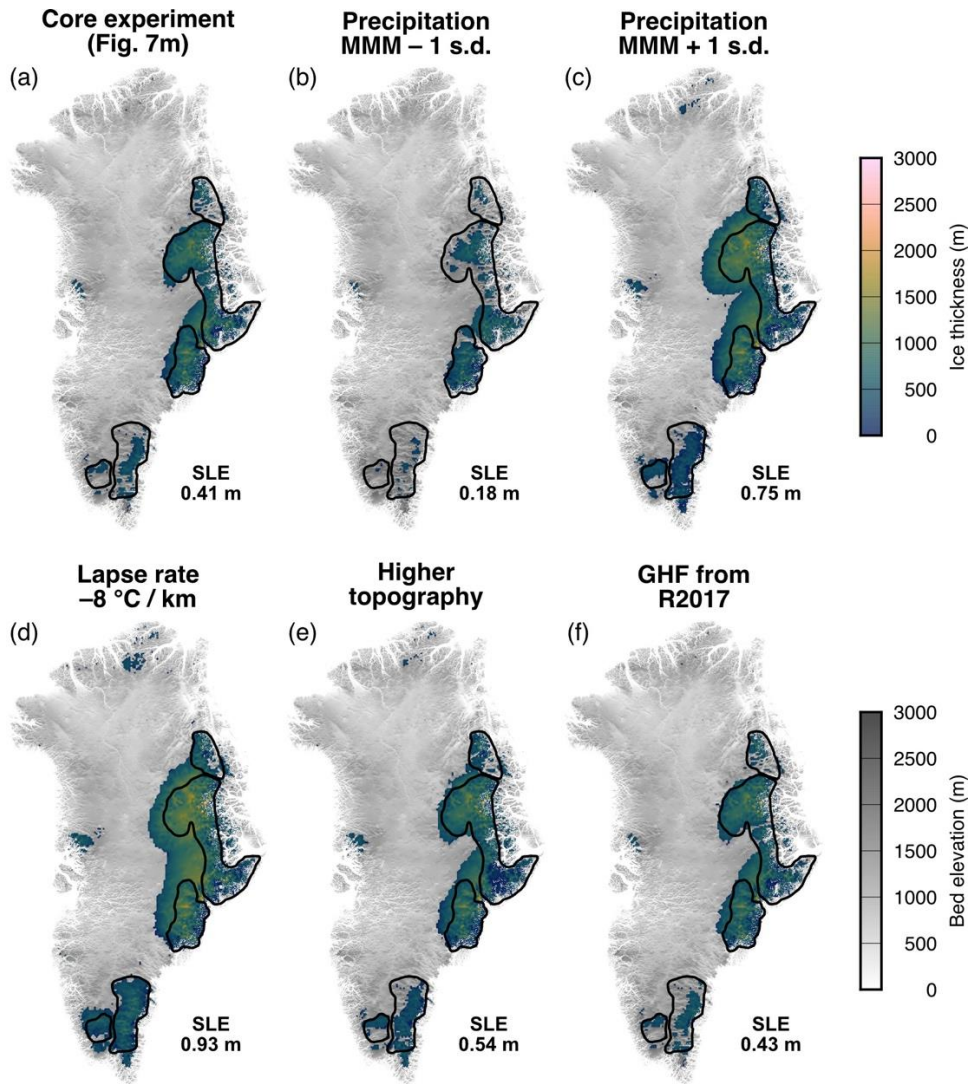

30 **Figure S3: Sensitivity testing of modelled GrIS thickness to precipitation, atmospheric lapse rate, bed topography, and geothermal heat flux.** (a) Control experiment with the temperature field that best-matches the mapped palaeo-glacial valley limit in the eastern highlands (panel m in Fig. 7 in the main manuscript). (b) Experiment with precipitation decreased to one standard deviation (s.d.) below the PlioMIP2 multi-model mean. (c) Experiment with precipitation increased to one standard deviation above the PlioMIP2 multi-model mean. (d) Atmospheric lapse rate increased to  $-8\text{ }^{\circ}\text{C km}^{-1}$ . (e) Reconstructed pre-glacial bed topography increased to its maximum ('high') elevation scenario. (f) Geothermal heat flux (GHF) changed to the Rezvanbehbahani et al. (2017) (R2017) model. SLE = sea level equivalent.

35
